# Supplementary material
Source: PubMed Central journal article supplement (PMC1589990)

**A**

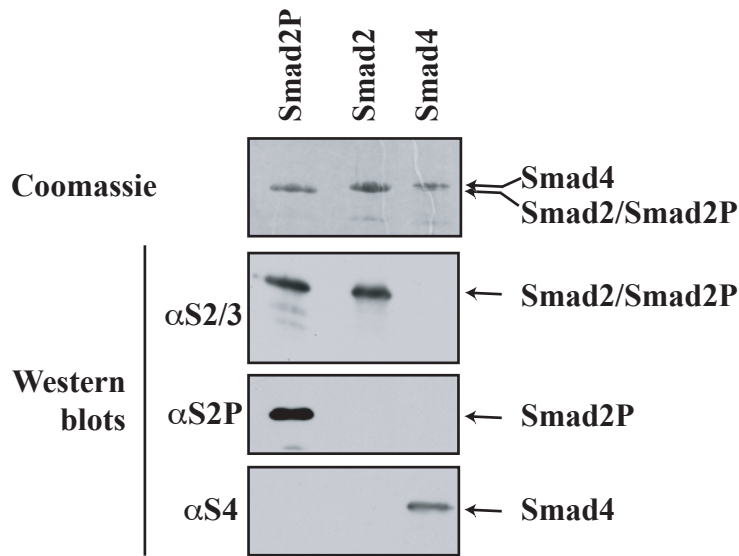

**B**

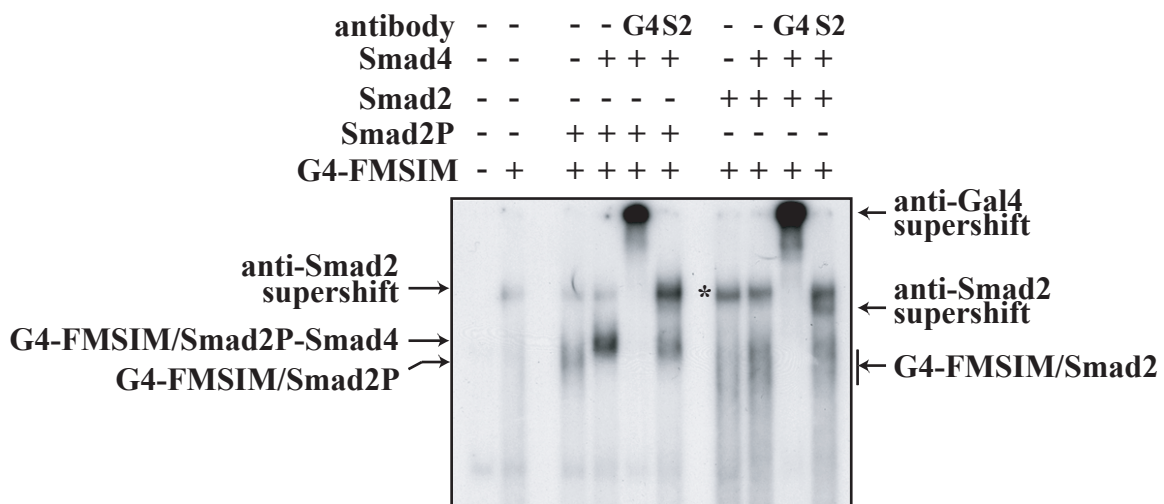



**A**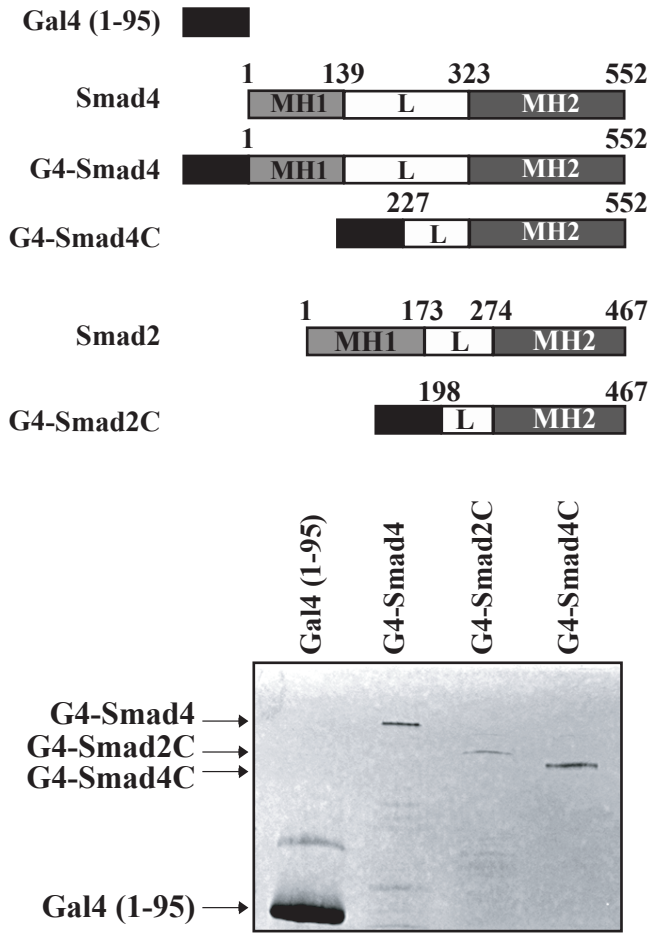**B**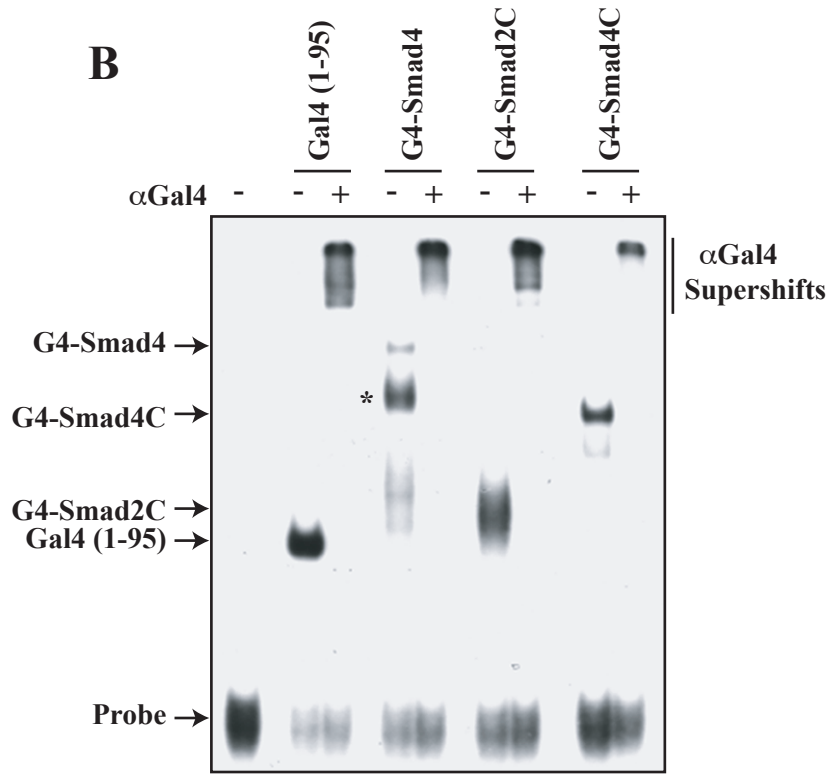**C**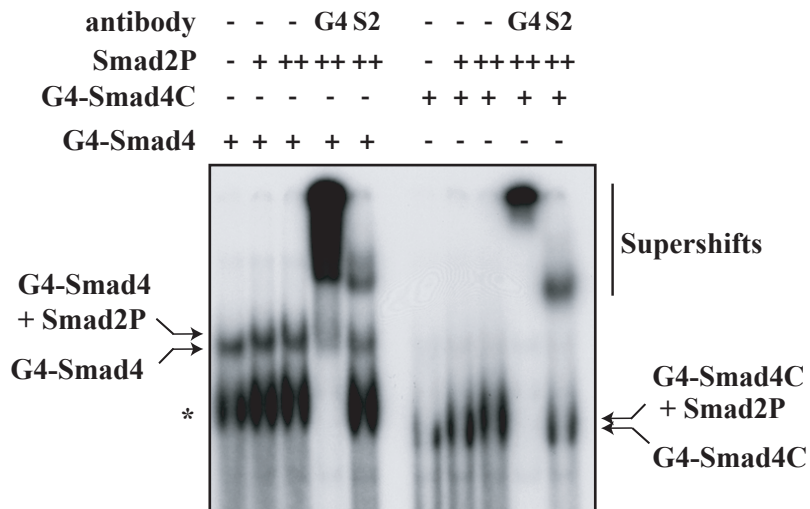

Supplement: 7601332s2.pdf [file 7601332s2.pdf]

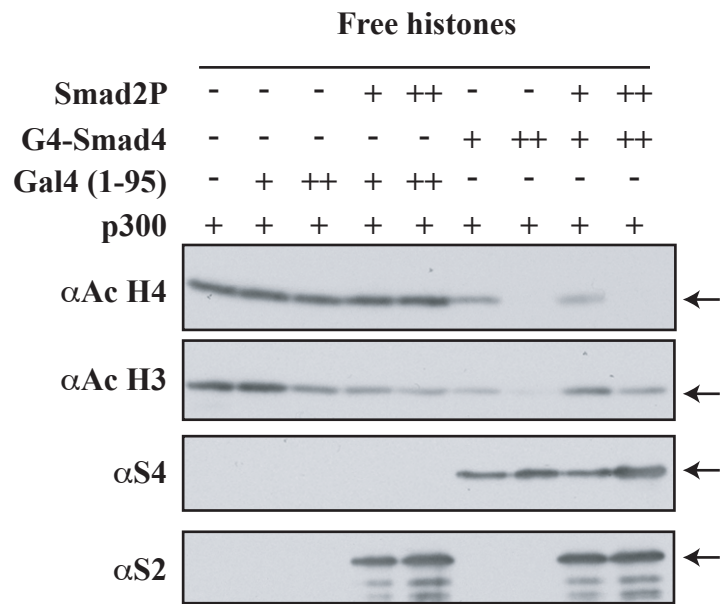

**A**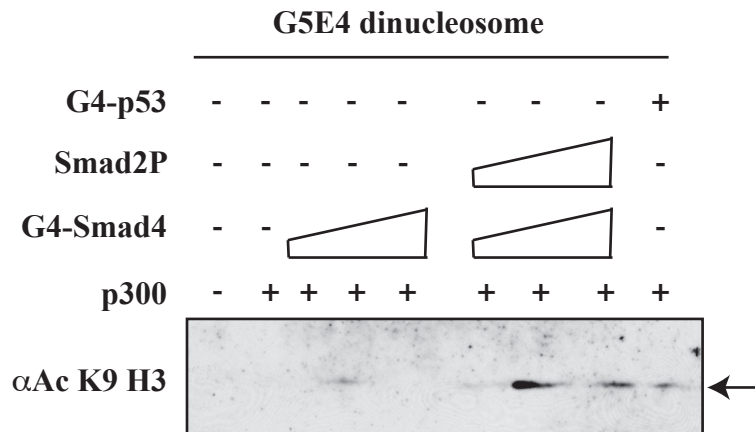**B**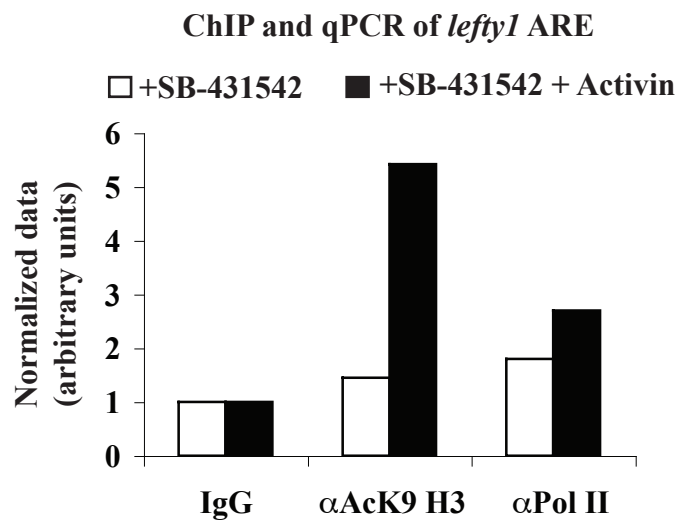**C**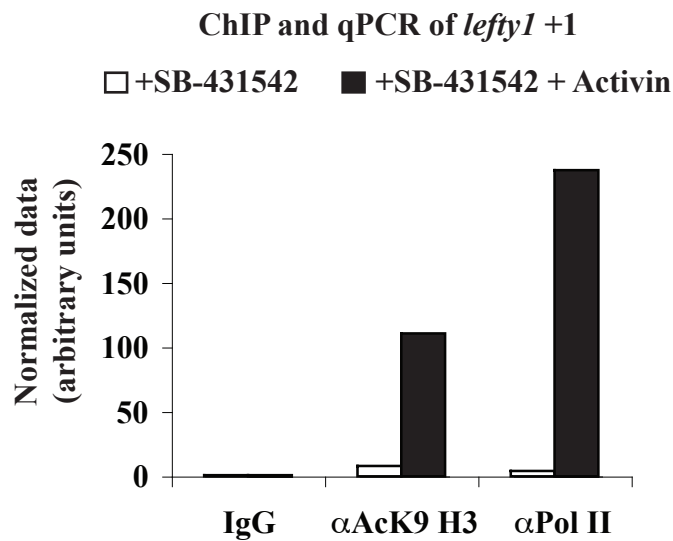

**A**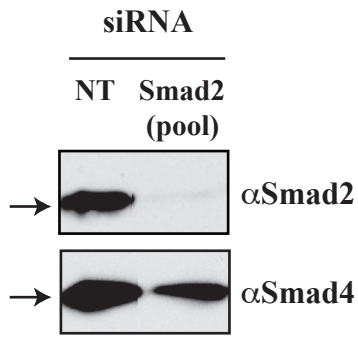**B**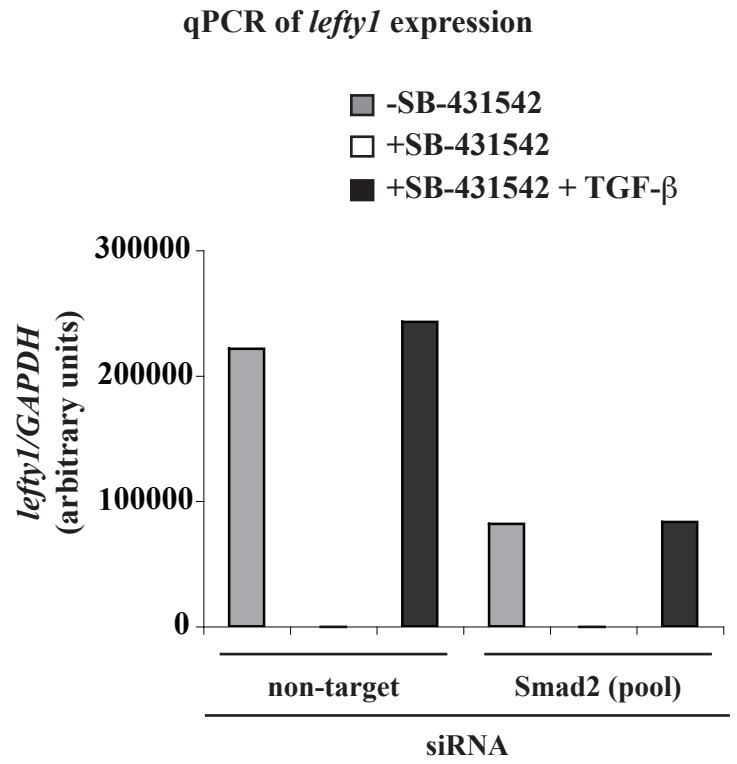**C**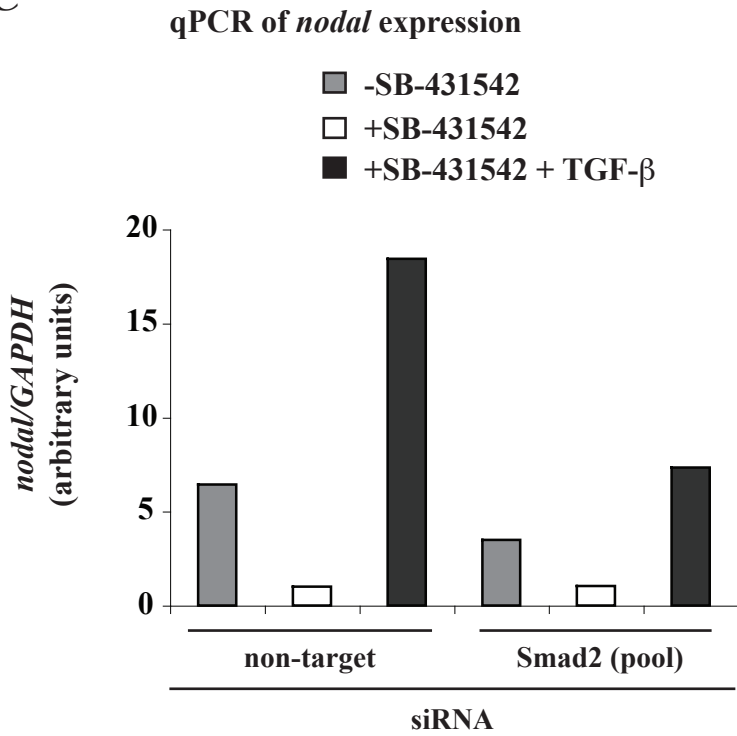

Supplement: 7601332s3.pdf [file 7601332s3.pdf]
